# Supplementary material for: Synthesis of nitrogen-doped carbon nanostructures from polyurethane sponge for bioimaging and catalysis
Source: Royal Society of Chemistry journal article supplement (doi:10.1039/c5nr03481g), 2015-01-01
Supplement: c5nr03481g1.pdf [file c5nr03481g1.pdf]

## Synthesis of Nitrogen-Doped Carbon Nanostructures from Polyurethane Sponge for Bioimaging and Catalysis

Yong Yang, Jingchao Zhang, Jing Zhuang, Xun Wang\*

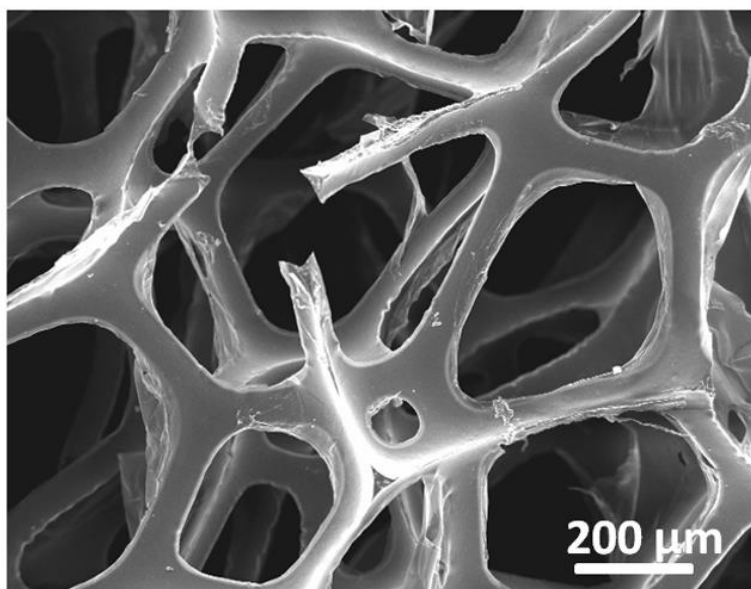

**Figure S1.** SEM image of the commercial PU sponges.

**Table S1.** The percentages of C, H, and N of different PU sponges

| Sample | C (%) | H (%) | N (%) |
|--------|-------|-------|-------|
| 1      | 58.98 | 7.05  | 6.99  |
| 2      | 54.44 | 6.82  | 5.80  |
| 3      | 61.43 | 8.36  | 6.85  |
| 4      | 55.86 | 6.64  | 6.57  |
| 5      | 63.19 | 7.90  | 7.92  |

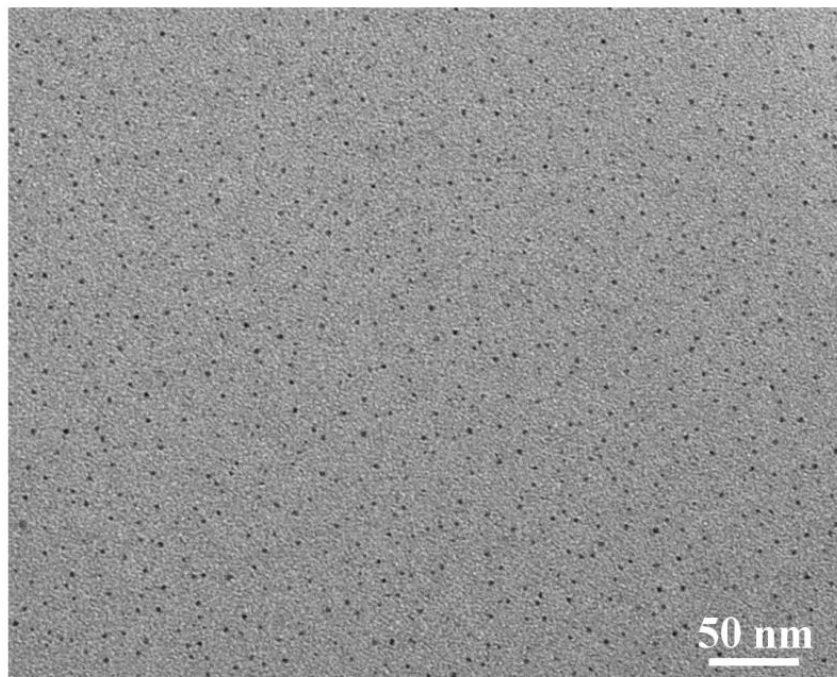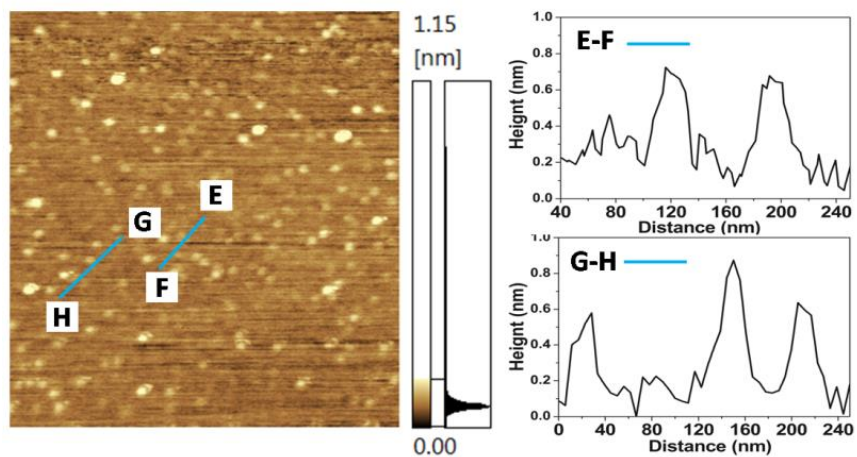

**Figure S2.** TEM image of as-prepared N-CDs and the correspondingly AFM topography image of the N-CDs on a mica substrate

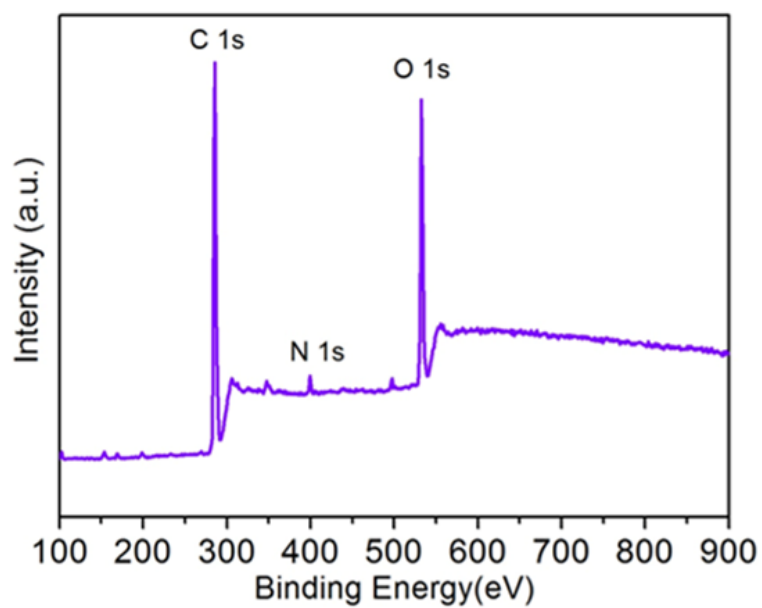

**Figure S3.** XPS analysis of as-prepared N-CDs.

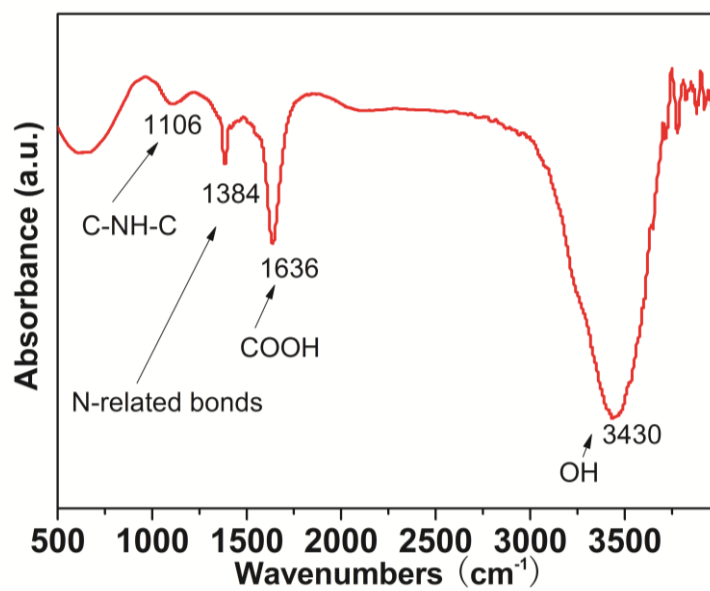

**Figure S4.** FTIR spectra of as-prepared N-CDs.

**Table S2.** Hydrothermal treatment of various PU sponges

| Serial                                                                              | Reaction condition                         |            | Photos of CDs aqueous                                                                |                                                                                       |
|-------------------------------------------------------------------------------------|--------------------------------------------|------------|--------------------------------------------------------------------------------------|---------------------------------------------------------------------------------------|
|                                                                                     | In (Teflon)-lined autoclave/180 °C for 2 h |            | Visible light                                                                        | UV light                                                                              |
|    | 10mg                                       | 30ml Water |    |    |
|   | 10mg                                       | 30ml Water |   |   |
|  | 10mg                                       | 30ml Water |  |  |
|  | 10mg                                       | 30ml Water |  |  |
|  | 10mg                                       | 30ml Water |  |  |

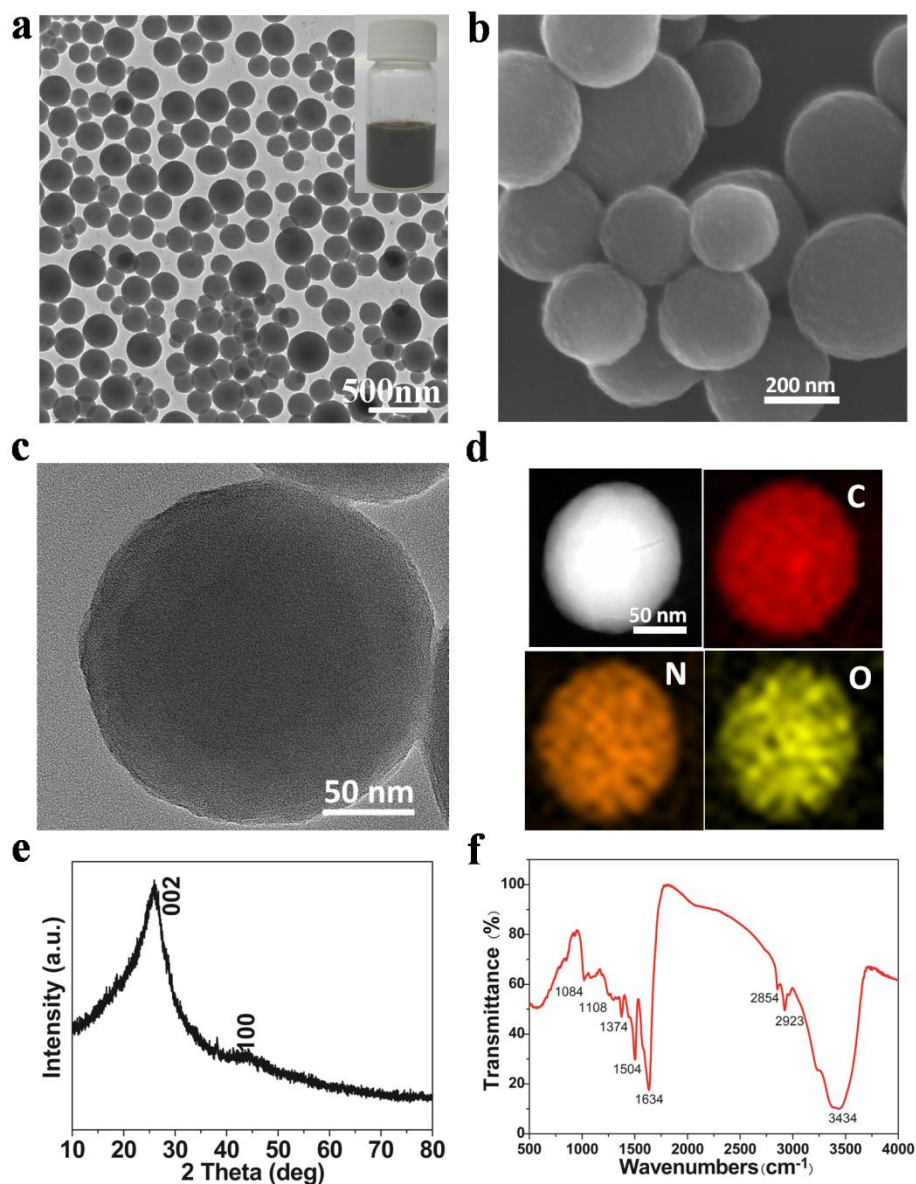

**Figure S5.** (a-b) TEM images of the as-prepared N-CSs under different magnifications. The inset is a photograph of the N-CSs aqueous solution. (c) HRTEM image of the as-prepared N-CSs. (d) EDX element mapping images of N-CSs. Note that the distribution of elements is homogenous throughout the whole particle. (e) XRD pattern of N-CSs. (f) FTIR spectra of N-CSs. In Fourier transform infrared spectra. The XRD pattern show two broad diffraction peaks at  $2\theta$  values of around  $25^\circ$  and  $43^\circ$ , corresponding to (002) and (101) lattice planes of hexagonal graphitic carbon, respectively. The broad absorption bands at  $3434\text{ cm}^{-1}$  and  $2923\text{ cm}^{-1}$  are assigned to the stretching vibrations of C-OH and C-H, and the band at  $1635\text{ cm}^{-1}$  and  $1504\text{ cm}^{-1}$  are attributed to the vibrational absorption band of C=O and C=C stretching vibrations. The peaks at  $1108$  or  $1370\text{ cm}^{-1}$  are attributed to the asymmetric stretching vibrations and bending vibrations.

**Table S3.** XPS analysis of N-CDs and N-CSs

|                       | N-CDs | N-CSs |
|-----------------------|-------|-------|
| C-C/C=C (%)           | 75.80 | 74.07 |
| Oxygenated carbon (%) | 21.72 | 17.77 |
| Nitrous carbon (%)    | 2.48  | 8.16  |

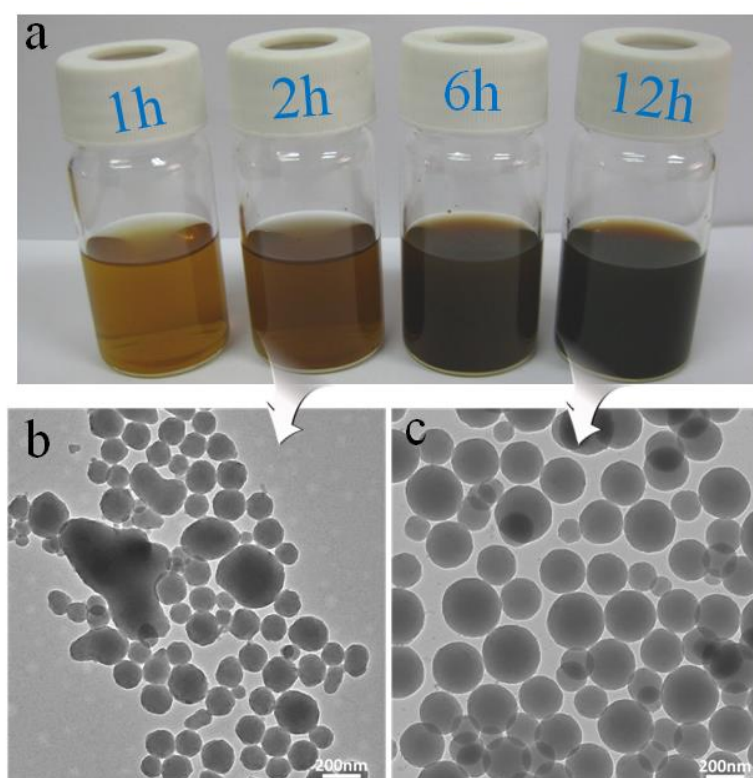

**Figure S6.** (a) The photographs of the reaction solutions with different reaction time. Note that the color of upper solution gradually change follow yellow to light brown and finally black, suggesting the formation of N-CSs. (b-c) The corresponding of TEM images with different reaction time.



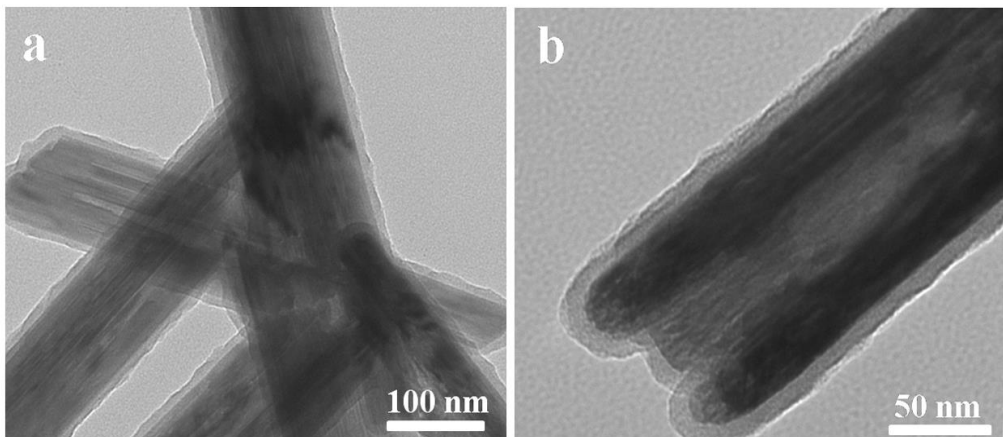

**Figure S7.** (a-b) TEM images of the prepared MnO<sub>2</sub>@N-Cs composites.

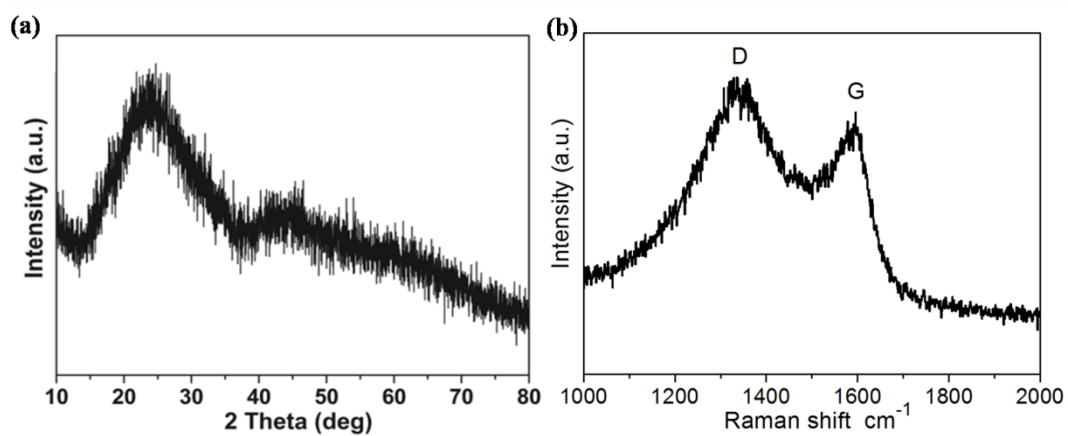

**Figure S8.** XRD and raman spectra of N-CNTs.

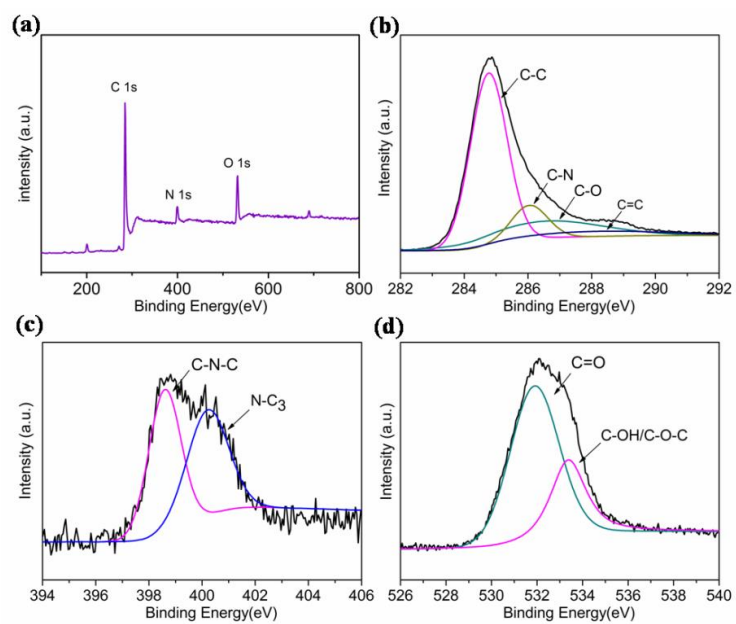

**Figure S9.** XPS spectra of the N-CNTs. (a) Survey spectrum. (b) C1s spectrum. (c) N1s spectrum. (d) O1s spectrum.

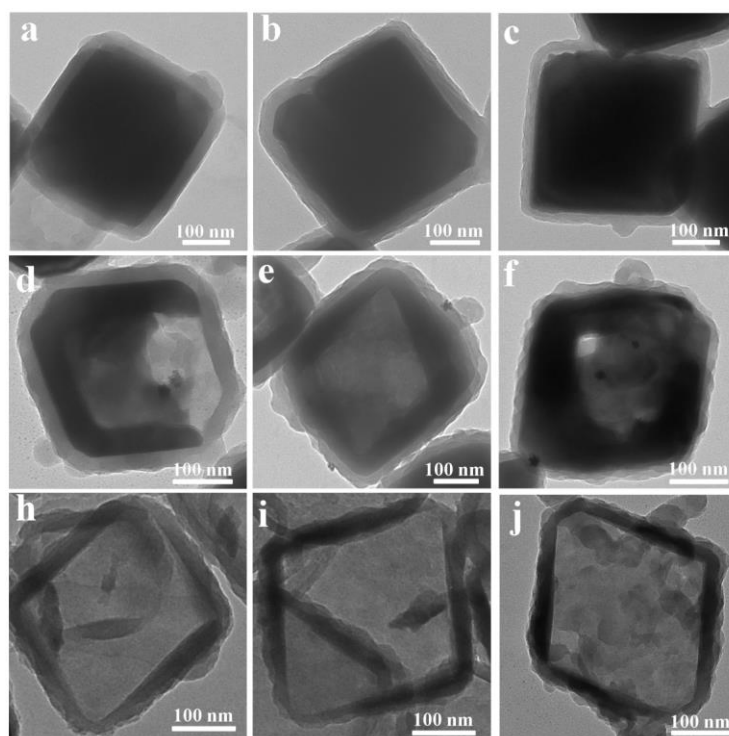

**Figure S10.** TEM images of  $\text{Mn}_3\text{O}_4@N\text{-CS}$  core-shell structure during the hydrothermal treatment at  $200\text{ }^\circ\text{C}$  with different reaction time: (a-c) 3h; (d-f) 6h. (h-j) TEM images of N-CCs obtained by acid treatment.



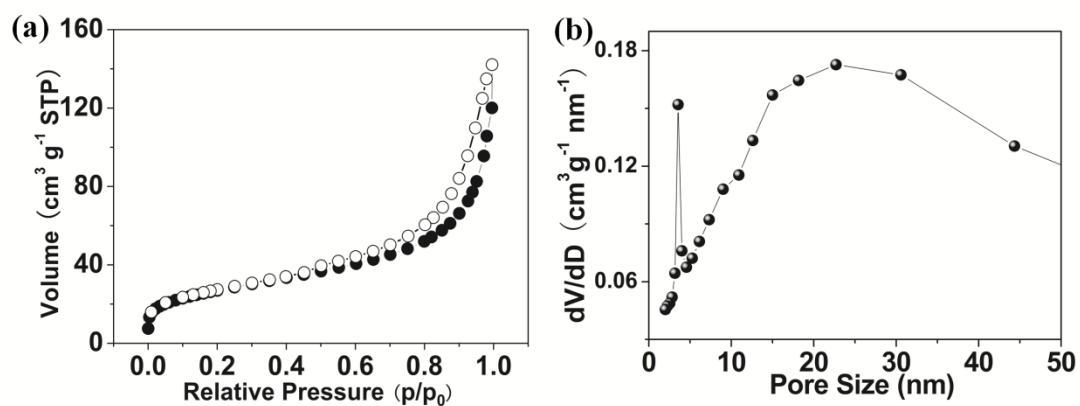

**Figure S11.** (a) N<sub>2</sub> adsorption/desorption isotherms, and (b) corresponding pore size distribution of the carbon nanocages.

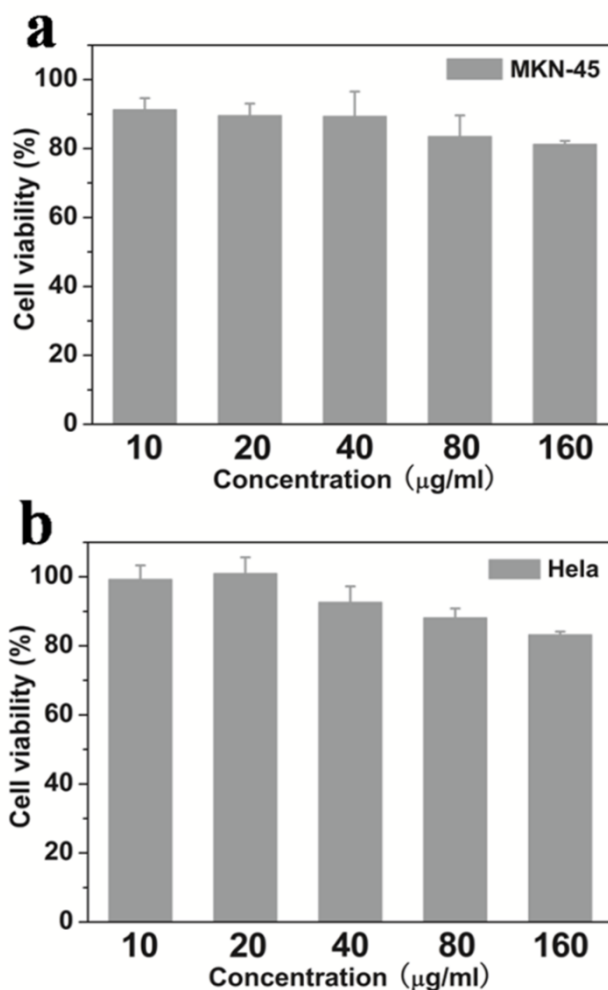

**Figure S12.** Cytotoxicity testing results via a MTT assay in MKN-45 (a) and HeLa (b) living cells (means $\pm$ SD,  $n=3$ ). Graphs were plotted as the N-CDs concentrations of 10, 20, 40, 80 and 160  $\mu\text{g}\cdot\text{mL}^{-1}$ , respectively.
